# Supplementary material for: Metabolic selection of a homologous recombination-mediated gene loss protects Trypanosoma brucei from ROS production by glycosomal fumarate reductase
Source: PubMed Central journal article supplement (PMC8065229; doi:10.1016/j.jbc.2021.100548), 2021-03-17
Supplement: mmc1.pdf [file mmc1.pdf]

**Table S1.** Excreted end products from metabolism of non-enriched glucose and [U-<sup>13</sup>C]-proline metabolism by the tetracycline-induced (.i) and non-induced (.ni)  $\Delta pepck^*/^{OE}FRDg-\Delta SKI$  mutant cell lines.

|                                   | $\Delta pepck^*/^{OE}FRDg-\Delta SKI.ni$ <sup>a</sup>                  | $\Delta pepck^*/^{OE}FRDg-\Delta SKI.i$ |
|-----------------------------------|------------------------------------------------------------------------|-----------------------------------------|
|                                   | nmol.h <sup>-1</sup> .10 <sup>8</sup> cells <sup>-1</sup> <sup>b</sup> |                                         |
| n <sup>c</sup>                    | 3                                                                      | 3                                       |
| Succinate (glucose <sup>d</sup> ) | nd <sup>e</sup>                                                        | nd                                      |
| Succinate (proline <sup>d</sup> ) | 233 ±12                                                                | 221 ±16                                 |
| Acetate (glucose)                 | 494 ±46                                                                | 480 ±49                                 |
| Acetate (proline)                 | 576 ±16                                                                | 572 ±19                                 |
| Alanine (glucose)                 | 250 ±18                                                                | 237 ±12                                 |
| Alanine (proline)                 | 81 ±4                                                                  | 84 ±7                                   |
| <b>Total (glucose)</b>            | <b>600 ±80</b>                                                         | <b>571 ±76</b>                          |
| <b>Total (proline)</b>            | <b>576 ±27</b>                                                         | <b>572 ±15</b>                          |

<sup>a</sup> .i: RNAi cell line induced during 7 days by addition of tetracycline; .ni: non-induced RNAi cell line

<sup>b</sup> The amounts of end products excreted from glucose and proline metabolism are expressed as nmoles excreted per hour and per 10<sup>8</sup> cells

<sup>c</sup> Number of biological replicates

<sup>d</sup> Carbon source metabolized into succinate

<sup>e</sup> nd: not detectable

Figure S1

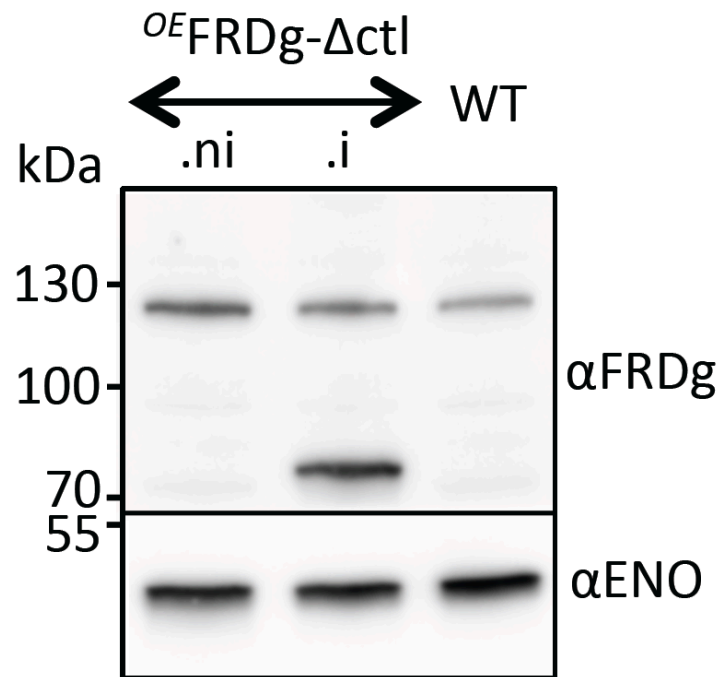

**Fig S1. Expression of FRDg- $\Delta$ ctl in the parental (WT) background.**
